1 Systematic identification of novel regulatory interactions controlling biofilm formation in the bacterium  
2 *Escherichia coli*

3  
4  
5  
6  
7  
8  
9 Gerardo Ruiz Amores<sup>1</sup>, Aitor de las Heras<sup>2,3</sup>, Ananda Sanches-Medeiros<sup>1</sup>, Alistair Elfick<sup>2,3</sup> and Rafael Silva-Rocha<sup>1\*</sup>

10  
11  
12  
13  
14  
15 <sup>1</sup>FMRP - University of São Paulo, Ribeirão Preto, SP, Brazil

16 <sup>2</sup>Institute for Bioengineering, School of Engineering, University of Edinburgh, Edinburgh, UK

17 <sup>3</sup>SynthSys Research Centre, University of Edinburgh, Edinburgh, UK

18  
19  
20  
21  
22  
23  
24  
25  
26  
27 **Running Title:** Regulatory network for biofilm formation in bacteria

28 **Keywords:** Biofilm formation in bacteria, regulatory network, global regulation

29  
30  
31  
32  
33  
34  
35  
36  
37  
38  
39  
40  
41  
42  
43 

---

\*Correspondence to: Rafael Silva-Rocha  
44 Faculdade de Medicina de Ribeirão Preto, Universidade de São Paulo  
45 Av. Bandeirantes, 3.900. CEP: 14049-900.  
46 Ribeirão Preto, São Paulo, Brazil  
47 Tel.: +55 16 3602 3107; Fax: +55 16 3633 6840  
48 E-mail: [silvarochar@gmail.com](mailto:silvarochar@gmail.com)  
49

## 50 **ABSTRACT**

51 Here, we investigated novel interactions of three global regulators of the network that controls biofilm formation in the  
52 model bacterium *Escherichia coli* using computational network analysis, an *in vivo* reporter assay and physiological  
53 validation experiments. We were able to map critical nodes that govern planktonic to biofilm transition and identify 8  
54 new regulatory interactions for CRP, IHF or Fis responsible for the control of the promoters of *rpoS*, *rpoE*, *flhD*, *fliA*,  
55 *csgD* and *yeaJ*. Additionally, an *in vivo* promoter reporter assay and motility analysis revealed a key role for IHF as a  
56 repressor of cell motility through the control of FliA sigma factor expression. This investigation of first stage and  
57 mature biofilm formation indicates that biofilm structure is strongly affected by IHF and Fis, while CRP seems to  
58 provide a fine-tuning mechanism. Taken together, the analysis presented here shows the utility of combining  
59 computational and experimental approaches to generate a deeper understanding of the biofilm formation process in  
60 bacteria.

61

---

## 62 **INTRODUCTION**

63 Bacteria shift from their free-swimming lifestyle to adopt a community structure to benefit from the micro-environment  
64 created in a biofilm <sup>1</sup>, gaining protection against hazardous substances, and leading in some cases, to antibiotic  
65 resistance <sup>1,2,3</sup>. It is well-understood that when differentiating from the planktonic to a biofilm structure bacteria transit  
66 through specific stages, with each functional stage accompanied by changes to expression of specific genes of the  
67 flagella-biofilm regulatory network <sup>1,2,3</sup>. In *Escherichia coli*, the complex transcriptional regulatory network of flagella  
68 function and curli fimbriae production, the principal biofilm structure indicator, has been investigated in various  
69 reports <sup>4,5,6,7</sup>. In this organism, the process is controlled by the RpoS sigma factor and FlhDC regulator. These  
70 master regulators receive major regulatory inputs from c-di-GMP, cAMP and ppGpp, which are modulated by a series  
71 of environmental and physiological stresses <sup>8,9,10</sup>. In this sense, the *flhDC* genes are expressed at post-exponential  
72 phase and their products control more than 60 genes involved in flagella synthesis and related functions, such as  
73 chemotaxis <sup>11</sup>. Also at stationary phase, the general stress response master regulator RpoS is produced and controls

74 over 500 genes in a highly complex regulatory network <sup>7</sup>. Therefore, the interplay between those master regulators  
75 and downstream-activated genes modulates the complex transition between planktonic and biofilm stages.

76 In the case of planktonic bacteria, mainly found in the exponential phase, flagella maintenance is due to the  
77 activation of effector molecules such as FliA sigma factor. Whilst, at stationary phase, biofilm formation is initiated by  
78 increasing levels in the secondary messenger c-di-GMP, as well as expression and activation of *rpoS*, which in turn  
79 leads to the activation of *csgD* <sup>5,12</sup>. Additionally, there are alternative mechanisms that involve different key genes of  
80 the biofilm pathway, also leading to *csgD* activation and scale-up of curli fiber production; such as CpxR and ClpX  
81 which play a complex dual role during bacterium development to inhibit or activate both programs <sup>8, 10, 13</sup>.  
82 Undoubtedly, the interplay between these molecules acts to modulate the proper execution of the flagella-biofilm  
83 program <sup>14,15</sup>. Experimentally, the transition between flagella and biofilm formation is evaluated using a “batch cells”  
84 assay, in which cells grow and attach to the chemically-inert surface of a microliter dish under static conditions,  
85 generating a biofilm in an “aquatic environment”. Additionally, the “macro-colonies” assay allows a bacterial  
86 population to grow over extended periods of time on agar plates, leading to striking morphological patterns,  
87 resembling biofilms growing in biological materials.

88 While hundreds of reports have dissected the molecular mechanisms leading to biofilm formation in several bacterial  
89 groups, a full understanding the dynamics of the complex regulatory network controlling planktonic to biofilm  
90 transition still lies out of reach. This is particularly true since most studies analyzed the effect of particular regulators  
91 on the expression of specific sets of genes, without addressing the complexity of the network using a more  
92 systematic approach. In particular, since a few global regulators (GRs) are able to control most of the genes in  
93 genome of *E. coli* <sup>16</sup>, it is anticipated that the role of these transcriptional factors in the biofilm formation network is  
94 rather underestimated. GRs are expressed or activated differentially during growth or under specific input signals <sup>17</sup>.  
95 Specifically, CRP is related to the control of metabolic processes in bacteria and it is differentially activated by  
96 substrates <sup>18</sup>, while IHF (growth rate dependent) and Fis (expressed at early exponential phase) are dual nucleoid  
97 associated proteins (NAPs) that can work both as activators and repressors <sup>19,20</sup>. During the transition from motile  
98 cells to biofilm structure, a mixture of different developmental stages occur. In this sense, small molecules and GRs

99 direct the activation of signaling proteins that are sensed by neighboring cells, coordinating the construction of this  
100 complex community structure<sup>14,15</sup>. Therefore, mapping hidden interactions in the flagella-biofilm regulatory network  
101 would provide a better understanding of this developmental-like program and provide new targets for intervention  
102 and/or engineering<sup>21,22</sup>.

103 In this work, we used computational tools and molecular biology, together with microbiology approaches to  
104 investigate the effect of the GRs CRP, IHF and Fis on the *E. coli* flagella-biofilm network. First, to analyze regulatory  
105 interactions already reported, we reconstructed the flagella-biofilm transcriptional regulatory network *in silico* using  
106 previous data and we analyzed its structure. Next, by using promoter expression assays, we mapped novel  
107 regulatory interactions between the three GRs and key genes controlling biofilm formation. Finally, novel regulatory  
108 interactions mapped using this approach were added to the original network to generate an enhanced appreciation of  
109 biofilm formation. The general strategy used here is depicted in **Fig. 1**. These results suggest that IHF and Fis are  
110 important modulators of the process while CRP seems to exert a fine-tuning effect. Additionally, using motility,  
111 adherence and biofilm formation assays, we validated key regulatory effects observed using transcriptional fusions.  
112 All together, the systematic investigation presented here adds new understanding of the complex regulatory program  
113 that controls biofilm formation in *E. coli*, revealing a novel player in this network.

## 114 **RESULTS AND DISCUSSION**

### 115 ***In silico* analysis of the regulatory network controlling planktonic to biofilm transition in *E. coli***

116 To reconstruct the flagella-biofilm regulatory network, information regarding the transcriptional regulation of *E. coli*  
117 was gathered from scientific articles and compiled with that from RegulonDB<sup>23</sup> and KEGG DB<sup>24</sup>. The resulting  
118 network consisted of 37 nodes representing the connections between different transcription factors (TFs), GRs and  
119 small molecules (**Fig. 2**). The degree analysis (which shows the most connected nodes) of the flagella-biofilm  
120 transcriptional regulatory network identified three major hubs, *rpoS*, *flhD* and *csgD* (**Fig. S1A**). The betweenness and  
121 edge betweenness analysis which provides information about the most important nodes and paths in the network,  
122 shows that from 37 nodes, 8 seem to be the principal effectors that modulate the proper gene expression of the

123 network (*rpoS*, *csgD*, c-di-GMP, *rpoE*, *cpxR*, *clpX*, *flhD*, *fliA*). Interestingly, *rpoS* is the main effector in the network  
124 and it is modulated by different inputs. From those, c-di-GMP presents high betweenness and edge connection  
125 values (**Fig. 2**). From the 37 nodes, *rpoD* and CRP were the main nodes, which exert more out-regulatory signals to  
126 other nodes, while all others possessed fewer out-connections (**Fig. S1B**). Additionally, this analysis shows three  
127 paths that seem to be important to maintain balance in the network. The first critical connection that maintains  
128 flagella-biofilm program equilibrium lies between *rpoS* and *rpoE*, activating both *fliA* for motility and its repressor  
129 *matA*, to eventually develop adherence. Secondly, *rpoS* with the TF *cpxR*, which modulates *rpoE*, but also has an  
130 important connection with the TF *nsrR*, which represses *fliA* expression. Thirdly, the activation of *clpX* ATPase by  
131 *rpoS* that exerts *flhD* inhibition at post-transcriptional and/or post-translational levels <sup>25</sup>. From the analysis presented  
132 here, we selected ten genes in order to perform a systematic investigation of the effect of CRP, IHF and Fis, which  
133 are among the main GRs of the regulatory network of *E. coli* <sup>26</sup>. We expected that this approach would reveal some  
134 hidden interactions controlling the critical nodes of the flagella-biofilm network. The selected genes of interest were  
135 *rpoS*, *rpoE*, *csgD*, *cpxR*, *flhD*, *fliA*, *matA*, *ompR*, *adrA* and *yeaJ*. In order to analyze the promoter activity of the  
136 selected genes, the promoter regions of the genes were cloned upstream of a GFP<sub>lva</sub> reporter system <sup>27</sup> and used to  
137 transform wild-type and  $\Delta ihf$  and  $\Delta fis$  mutant strains of *E. coli*. As control, an empty reporter plasmid and a strong  
138 synthetic promoter named BBa\_J23100 ([http://parts.igem.org/Part:BBa\\_J23100](http://parts.igem.org/Part:BBa_J23100), here referred as *Pj100*) were also  
139 used to transform the same strains (**Fig. S2**). The 36 reporter strains were then analyzed as presented in the next  
140 section.

141

#### 142 **CRP, IHF and Fis modulate promoters of *rpoS*, *rpoE* and *flhD* master regulators**

143 We started our investigation by considering the three putative master regulators of the transition from planktonic to  
144 biofilm phases. The sigma factor RpoS has been proposed as a main regulator of the flagella-biofilm network <sup>7,8</sup>, in  
145 agreement with our network analysis. Thus, we were interested to understand the effect of these three GRs on the  
146 promoter region of the *rpoS* gene. For this, overnight cultures of *E. coli* wild-type strain carrying the transcriptional  
147 *PrpoS::GFP<sub>lva</sub>* fusion were diluted 1:100 in fresh M9 minimal medium supplemented with glycerol as sole carbon

148 source, and GFP fluorescence was measured at 20 minute time intervals over 8 hours at 37°C. As can be seen in  
149 **Fig. 3A**, the analyzed promoter presented a growth-phase-dependent activity with increased activity toward the end  
150 of the growth curve. When the same reporter system was analyzed in *E. coli*  $\Delta ihf$  and  $\Delta fis$  mutant strains, we  
151 observed a significant increase in promoter activity in the absence of IHF and a strong activity in the absence of Fis  
152 (**Fig. 3A left panel**, red and green lines, respectively). These data strongly suggest that IHF and Fis GRs are acting  
153 to repress the *rpoS* promoter. To understand the role of CRP over the *rpoS* promoter region, we employed the  
154 glucose inducible CCR system to down-modulate the activity of CRP by adding glucose in the same experimental  
155 conditions as described above <sup>28</sup>. When the three reporter strains were analyzed in the presence of 0.4% glucose,  
156 we observed the same general expression profile as in **Fig. 3A left panel** but a remarkably reduced promoter activity  
157 (**Fig. 3A right panel**), confirming the previously reported positive role of CRP on the *rpoS* promoter <sup>29</sup>. Additionally,  
158 since the synthetic constitutive promoter (*Pj100*) was not significantly affected in the strains and conditions used (**Fig.**  
159 **S2**), we concluded that the effects observed for *rpoS* promoter are true regulatory events taking place at this  
160 element.

161 When we analyzed the activity of the *rpoE* promoter, which controls the expression of a sigma factor linking RpoS  
162 activity with flagella genes (**Fig. 2**), we observed a strong increase in promoter activity in the  $\Delta ihf$  and  $\Delta fis$  strains of  
163 *E. coli* when compared to the wild-type strain (**Fig. 3B left panel**), indicating that IHF and Fis have a negative effect  
164 on the activity of this promoter. However, contrary to the observation for *rpoS*, the addition of glucose (**Fig. 3b right**  
165 **panel**) to the media (which inhibits CRP activity) did not result in any significant change in *rpoE* promoter activity.

166 After investigating the activity of *rpoS* and *rpoE* promoters, we analyzed the promoter of *flhD* gene, which encodes a  
167 master regulator of flagellar genes and of the flagella-related *fliA* sigma factor <sup>30</sup>. Using the same experimental  
168 conditions as described above, we first observed that *flhD* promoter activity has a strong growth-dependence, with  
169 activity increasing during the growth curve when assayed in the wild-type strain of *E. coli* (**Fig. 3C left panel**). When,  
170 we assayed the promoter activity in  $\Delta ihf$  and  $\Delta fis$  mutant strains, we observed a similar expression profile as in the  
171 wild-type, with the exception that in both strains the initial promoter activity was significantly higher than in the wild-  
172 type. When we assayed promoter response in the three strains in the presence of glucose (to trigger CRP

173 inactivation), activity was strongly impaired in all strains (**Fig. 3C right panel**), confirming the reported role of CRP as  
174 activator of *flhD* expression <sup>31</sup>.

#### 175 **Novel regulatory effects for CRP, IHF and Fis exerted on *csgD*, *fliA* and *yeaJ* promoters**

176 Once we had investigated the effect of the GRs of flagella to biofilm transition, we decided to analyze the promoters  
177 of genes related to biofilm formation and an additional lower flagella regulator (*fliA*). CsgD is a central protein related  
178 to, and an indicator of, biofilm formation <sup>12, 32</sup>. When we analyzed the activity of *csgD* promoter in the wild-type strain,  
179 we observed a peak of expression at about 200 min of growth with a reduced activity later in the growth phase (**Fig.**  
180 **4A left panel**). Investigating this promoter in  $\Delta ihf$  and  $\Delta fis$  mutants, we observed a strong decay in promoter activity,  
181 indicating that both proteins positively modulate the activity of the promoter. Moreover, when we added glucose to  
182 the growth media (**Fig. 4A right panel**), we observed a generalized decay in promoter activity in all three strains,  
183 indicating a positive role of CRP for this promoter. Reflecting on these results, it is interesting to note that, while CRP  
184 and IHF have been reported as positive regulators of the *csgD* promoter <sup>33, 34</sup>, the positive effect of Fis has never  
185 been demonstrated before.

186 In the case of the *fliA* gene that codes a sigma factor specifically related to flagella genes, analysis of promoter  
187 activity in both wild-type and  $\Delta fis$  mutant strains revealed a very low level of activity throughout the growth curve,  
188 both in the presence and absence of glucose (**Fig. 4B**). However, in the  $\Delta ihf$  mutant strain, this promoter displays a  
189 strong increase (30-fold) in activity in the absence of glucose (left panel), while this level was lower when glucose  
190 was added (right panel). Since *fliA* expression is dependent on FlhD <sup>30</sup>, the observed decay of *fliA* promoter activity  
191 during growth in the presence of glucose could be the result of a cascade process, with the apparent IHF repression  
192 of this promoter suggesting a previously unreported regulatory interaction. To test the direct effect of IHF on FliA, we  
193 identified two putative binding sites for this global regulator at *fliA* promoter **Fig. S3A**. We then constructed a mutant  
194 version of this promoter with 11 point mutations that fully abolish both sites and tested this new variant as before. As  
195 shown in **Fig. S3B**, expression of the mutated version of *fliA* promoter was low in the wild-type and  $\Delta fis$  mutant

196 strains at the same level as the original promoter, and displayed a higher activity in the *Δihf* mutant, both in the  
197 absence and presence of glucose. These data suggest that the effect of IHF on *fliA* promoter is indirect.

198 We next analyzed the effect of GRs on the expression of *yeaJ*, a diguanylate cyclase coding gene, which modulates  
199 the levels of c-di-GMP in the cell. In *E. coli*, deletion of *yeaJ* results in strains with reduced motility at 37 °C<sup>8</sup>,  
200 however no regulatory proteins have been demonstrated to play a role in the expression of this gene. The expression  
201 profile of the *yeaJ* promoter in wild-type and *Δihf* mutants strains showed a strong peak of activity at 200 min of  
202 experiment (**Fig. 4C**). However, when this promoter was assayed in the *Δfis* mutant, we observed a significant  
203 decrease in promoter activity, indicating that the Fis regulator could play a positive role in its expression.  
204 Furthermore, addition of glucose to the growth media (**Fig. 4C right panel**) resulted in an increase in the promoter  
205 activity in the first minutes of growth, suggesting the existence of additional, potentially CRP-dependent, regulatory  
206 mechanisms at this promoter. Finally, the additional three promoters selected for investigation (from *adrA*, *cpxR* and  
207 *ompR* genes, **Fig. S4**) displayed maximal activity very similar to that of the negative control (the empty reporter  
208 vector, pMR1 in **Fig. S2**), which precludes unequivocal conclusions concerning their regulation.

## 209 **Reconstruction and analysis of the regulatory network with novel interactions**

210 In order to generate fresh insight into the regulatory network controlling biofilm formation in *E. coli*, we added the new  
211 regulatory interactions identified in the previous sections to the network from **Fig. 2**. For this, the effect of CRP, IHF  
212 and Fis over the promoter regions obtained by our promoter activity assay was transformed into activation or  
213 inhibition links. From the 27 interactions tested, we suggested 8 new interactions, and were able to confirm 5  
214 described interactions (**Table S1**). We integrated these new interactions into the network and re-performed the  
215 centrality measurements. Using this approach, we observed that the integration of the experimental data changed the  
216 topology of the network, while maintaining the three major hubs identified (**Fig. S5A**). Yet, the out-degree analysis  
217 showed that *rpoD*, CRP, IHF, and Fis in minor degree are the main nodes exerting the most out-connections to all  
218 other nodes (**Fig. S5B**), while the edge betweenness analysis indicates that, upon the addition of the new interactions,  
219 the critical nodes of the network remain the same (**Fig. 5**). Taken together, these data suggest the existence of



220 previously unidentified regulatory interactions in the biofilm regulatory network that play a critical role in the planktonic  
221 to biofilm transition.

## 222 **Phenotypic consequences of loss of GRs for the planktonic and biofilm stages of *E. coli***

223 Flagella play an important function during the different developmental phases of biofilm formation such as attachment  
224 at a surface, as well as bacterial cell cohesion within the biofilm <sup>2,30</sup>. Therefore, we were interested in understanding  
225 the effect of the GRs CRP, IHF and Fis on the flagella function. As it can be seen in **Fig. 6**, after 24h of incubation in  
226 a low agar plate, *E. coli* BW25113 wild-type strain showed reduced motility in the absence of glucose. However,  
227 analysis of the  $\Delta ihf$  strain in similar conditions revealed a strong motile phenotype, with this effect more apparent  
228 after 24h of incubation with full spreading over the plate observed (**Fig. S6**). Finally, under similar conditions, the  $\Delta fis$   
229 strain presented reduced motility, which is more evident at 24h. It is important to notice that addition of glucose to the  
230 media generated a general decrease in motility of all strains (**Figs. 6 and S6**, right panels). Interestingly, the  
231 observed strong phenotypic effect of  $\Delta ihf$  on the motility of *E. coli* can be traced directly to the strong increase of *fliA*  
232 promoter activity in this mutant strain, since FliA sigma factor controls several genes related to flagella formation in  
233 this organism <sup>35</sup>.

234 We next analyzed the capability of the different strains to attach to a solid surface, which is indicative of early biofilm  
235 formation, using the protocol described by O'Toole *et al.*, 2011. For this, we performed the experiments at 30 °C and  
236 37 °C, since different reports have used different temperatures <sup>36,37</sup>. In general, *E. coli* cells adhered to the wall of the  
237 96-well plates in all conditions. At 37°C, two- or three-fold increases in biofilm yields were observed when compared  
238 with *E. coli* cells cultured at 30°C, as can be seen by comparing the biofilm indexes in **Fig. 7A**. In general terms, the  
239  $\Delta ihf$  mutant strain of *E. coli* displayed decreased adhesion at both temperatures, which is in agreement with the  
240 increased motility observed for this strain in **Fig. 6**. By the same token, adhesion of the  $\Delta fis$  mutant strain at 37 °C  
241 was significantly increased when compared to the wild-type, which could be due to the reduced motility observed  
242 before. In most of the cases, the general adhesion observed for the strains was decreased in the presence of  
243 glucose, with the exception of the adhesion level of  $\Delta ihf$  mutant at 30 °C. These data suggest that, at 37°C, CRP and

244 IHF are important effectors to activate the adherence program. They also suggest that Fis is acting as a repressor of  
245 the early biofilm program, since in its absence, motility is higher at 37 °C. Altogether, adherence yields are better  
246 when induced at 37°C than at 30°C, and the three GRs CRP, IHF and Fis participate differentially to regulate the  
247 adherence capabilities of *E. coli*.

248 As depicted in **Fig. S7**, all the strains were capable of developing biofilm structures at 30 °C and 37 °C in the  
249 presence or absence of glucose, as previously reported. In general, *E. coli* cells grown at 30 °C produced a biofilm  
250 structure resembling that reported for 28 °C, while those grown at 37 °C conditions showed a more visually complex  
251 biofilm structure with three morphologically distinct zones, as reported by Serra *et al.*, 2013 (**Fig. 7B**). More explicitly,  
252 in wild-type cells a concentric ring delineates zone 3, which presents an intense red color suggesting curli formation  
253 by the different layers of stationary phase cells. Zone 2 represents the intrinsic capability of wild-type community to  
254 produce wrinkles and curli. Finally, zone 1 presents weak red color, an indicative of bacteria at exponential phase  
255 related with colony expansion but not with curli production <sup>7</sup>. In the presence of glucose, the biofilm structure formed  
256 by the wild-type strain presented slight differences. When we analyzed the  $\Delta ihf$  mutant strain, we observed a  
257 significant reduction in the colony size and degree of pigmentation (that could be related to lower curli production)  
258 when compared to the two other strains (**Fig. 7B**). This size reduction can be evidenced by the systematic decrease  
259 in the three zones of the colony in this strain. Yet, analysis of biofilm formation in this strain in the presence of  
260 glucose showed a recovery in colony size generated by a high expansion of zone 1, while pigmentation was  
261 apparently not affected. Finally, the analysis of  $\Delta fis$  mutant strain revealed a colony where the zone 1 (expansion  
262 zone) could not be detected. Additionally, this strain presented a darker zone 3, which could be indicative of higher  
263 production of curli fimbriae than wild-type strain, with addition of glucose to the growth media only generated small  
264 changes in the colony such as an apparent reduction in size.

265 Altogether, morphology assays have shown that IHF and Fis GRs are important contributors to proper biofilm  
266 development, as could be indicated by drastic changes in the three well-characterized zones in these mutants. In  
267 contrast, the role of CRP protein (which was indirectly assayed by the addition of glucose to the media) during  
268 mature biofilm formation could not be dependably inferred, since the change in the nutritional state of the colonies

269 could have a strong impact in the process. Taken together, these data indicate that these GRs could have an  
270 important role in the final biofilm structure in *E. coli* that could be the result of the detected change in gene expression  
271 of key regulatory elements in the planktonic to biofilm regulatory network.

## 272 **Conclusions**

273 The work presented here describes the systematic investigation of the regulatory interaction mediated by GRs during  
274 the transition from planktonic to biofilm in the bacterium *E. coli*. While several works have addressed this issue  
275 before, data generated has been fragmented and few targets have been investigated at each time. The systematic  
276 investigation used here allowed the identification of novel interactions mediated by CRP, Fis and IHF. More  
277 importantly, the modulation of some critical nodes, such as *fliA* by IHF, could explain the strong phenotypic effects  
278 observed for motility and attachment assays, as this regulator has also been found to be a modulator of genes  
279 involved in the biofilm program as *rpoS*, *matA* and *csgD*<sup>33, 38, 39, 40</sup>. The molecular mechanism involved in the different  
280 phases of biofilm formation by IHF remains to be determined. However, in this work, we present evidence that IHF is  
281 a key element to biofilm formation by modulating gene expression level of the flagella-biofilm program, suggesting  
282 that IHF could be a good candidate to disrupt/engineer bacterial biofilm structure. Here, we also demonstrated that  
283 Fis plays a more major role in the biofilm formation network than anticipated, both using promoter assays as well as  
284 physiological tests. The evidence in this study indicates that, CRP, IHF and Fis are important effectors that modulate  
285 the flagella-biofilm network. Interestingly, no condition in this study shows absence of motility or biofilm formation,  
286 suggesting that, while these GRs are important modulators of these processes, they are not essential genes to  
287 suppress completely the flagella-biofilm program. Additionally, it has been demonstrated that bacteria without the  
288 main effectors *rpoS* or *csgD* (also *rpoE*, *csgB*, *flhDC* or *fliA*) are still capable of producing a biofilm<sup>7, 41</sup>. Altogether,  
289 the high plasticity observed in the flagella-biofilm program clearly shows that the network has evolved the robustness  
290 to compensate for the loss of critical nodes, indicating the importance of this program for bacterial survival. Finally,  
291 the systematic identification of novel connections for a specific network will allow prediction of the behavior of the  
292 biological system in the absence of different TFs. It opens the possibility of using genetic engineering to achieve a  
293 balanced connectivity between synthetic circuits and the entire bacterial network when performing a specific task. In

294 other words, that rational interactive synthetic circuits can operate in accordance with the natural network of a  
295 specific organism, thereby allowing enhanced performance of a desired biological task.

296

297

## 298 **EXPERIMENTAL PROCEDURES**

### 299 **Bacterial strains, media and growth conditions**

300 The list of bacterial strains, plasmids and primers is presented in **Table1**. *Escherichia coli* wild-type (BW25113) or  
301 strains genetically depleted of IHF or Fis GRs <sup>42</sup> were used as the host of all plasmids. *E. coli* DH5 $\alpha$  or DH10b were  
302 used as cloning strains. DNA of *E. coli* BW25113 and MG1655 were used as templates. *E. coli* cells were grown in  
303 Luria Broth (LB) or M9 minimal media (6.4g/L Na<sub>2</sub>HPO<sub>4</sub>·7H<sub>2</sub>O, 1.5g/L KH<sub>2</sub>PO<sub>4</sub>, 0.25g/L NaCl, 0.5g/L NH<sub>4</sub>Cl)  
304 supplemented with 2mM MgSO<sub>4</sub>, 0.1mM CaCl<sub>2</sub>, 0.1mM casamino acids, and 1% glycerol or 0.4% glucose as the  
305 carbon source. Chloramphenicol was added (34  $\mu$ g/mL) to ensure plasmid maintenance. Cells were grown at 37°C  
306 with constant shaking at 220 rpm overnight.

### 307 **Plasmid construction**

308 Plasmids and primers used in this work are listed on Table 2 and 3 respectively. As a control of all experiments we  
309 transformed *E. coli* BW25113 wild-type and mutant strains with an empty pMR1 vector <sup>27</sup> and pMR1-Pj100. To  
310 analyze the signal integration of GRs at the studied genes, we amplified the promoter regions by PCR and cloned  
311 into pMR1 vector using standard protocols <sup>43</sup>. DNA from *E. coli* BW25113 wild-type was used as a template for all  
312 constructions except for *flhD* promoter, for which *E. coli* MG1655 was used. PCR was performed using 50 ng of DNA  
313 template with 50pmol of each primer (purchased from Sigma and extended) and 1U Phusion® High-Fidelity DNA  
314 Polymerase (New England Biolabs M0530L) in a 50  $\mu$ l reaction volume. Initial denaturation was at 98°C for five  
315 minutes; subsequently, amplification was done over 30 cycles at 98°C, 60°C and 72°C, each with duration of 30  
316 seconds. The final extension step was performed at 72°C for ten minute . All PCR products were gel purified and

317 cloned as EcoRI/BamHI fragments in pMR1, previously digested with the same enzymes. The resulting plasmids  
318 were DNA sequence verified and correct plasmids were used to transform *E. coli* BW25113 (wild-type), *E. coli*  
319 JW1702 ( $\Delta ihf$ ) and *E. coli* JW3229 ( $\Delta fis$ ).

320

### 321 **Promoter activity assay**

322 For promoter activity measurements, single colonies of wild-type and mutant *E. coli* strains harboring the different  
323 plasmids were picked from fresh plates. Each strain was inoculated and grown overnight at 37 °C in 2 mL of M9  
324 medium with glycerol or glucose containing chloramphenicol with shaking at 225 rpm. Stationary phase cultures were  
325 diluted to a final optical density (OD) of 0.05 in 200  $\mu$ L of M9 medium containing either glycerol or glucose as  
326 required, and supplemented with chloramphenicol. Cell growth and GFP fluorescence was quantified every 20  
327 minutes over an 8 hr incubation at 37 °C using Victor X3 plate reader (PerkinElmer, Waltham, Massachusetts, USA).  
328 Under these conditions, all strains presented similar growth rates (**Fig. S8**). Data were analyzed from at least three  
329 biological samples, arbitrary units were calculated by dividing GFP-corrected by OD600-corrected, subsequently, the  
330 mean and standard error for each promoter was calculated and graphed using Microsoft Excel and R software.

### 331 **Bacteria motility assay**

332 The effect of GRs on motility was evaluated as following. *E. coli* wild-type or mutant strains harboring pMR1 plasmid  
333 were grown overnight at 37°C on LB plates. Inoculation of a single colony onto motility plates (tryptone 1%, NaCl  
334 0.25%, agar 0.3% and when indicated glucose was added) was done by using a toothpick <sup>44</sup>. The motility halos were  
335 measured at 18h and 24h. Each strain was evaluated in triplicate from independent plates.

### 336 **Biofilm formation in liquid media**

337 Biofilm formation was assayed using the Microtiter Dish Biofilm Formation Assay <sup>45</sup>. Single colonies of *E. coli* wild-  
338 type or mutant strains harboring all the constructions were grown overnight at 37°C in M9 supplemented with glycerol  
339 or glucose. The cultures were diluted 1:100 in 200 $\mu$ l of fresh M9 media with either glycerol or glucose. A 96-well plate

340 was incubated at 37°C for 72h, after which cells were gently washed four times with distilled water and left at room  
341 temperature for 15 minutes with 200µL of crystal violet 0.1% w/v solution. Subsequently, vigorous washing was  
342 performed with distilled water (four times) and the plates left to dry at room temperature for 24h. Finally, 200µL acetic  
343 acid 30% w/v was added and after 15 minutes, the solution was transferred to a new plate and Optical Density at  
344 550nm was measured in FLUOstar Omega (BMG Labtech) plate reader. All the culture dilutions, staining and  
345 quantification steps were performed by using procedures developed for a robotic platform called Edwin <sup>46</sup>. Data from  
346 biological triplicates were analyzed by Microsoft Excel software. Average values and standard deviation was  
347 determined.

### 348 **Biofilm formation in solid media**

349 Biofilm morphology was evaluated by Congo red assay <sup>47</sup>. Chloramphenicol was added during all steps to ensure  
350 plasmid maintenance. Wild-type and mutant *E. coli* strains with pMR1 plasmid were grown overnight at 37°C on LB  
351 agar plates. Single colonies were picked and grown for 14h at 37°C on 1ml LB at 220rpm. The cultures were washed  
352 twice with MgSO<sub>4</sub> and resuspended in M9 media with either glycerol or glucose as required, to an OD at 600nm (~  
353 0.5). 5 µL drop of each culture was added into YESCA-CR plates <sup>48</sup>. YESCA media (1 g/L yeast extract, 20 g/L agar)  
354 was complemented with Congo red 50 µg/ml diluted in KPi buffer (50 mM potassium phosphate buffer, pH 7.2, 28.9  
355 mM KH<sub>2</sub>PO<sub>4</sub>, 21.1 mM K<sub>2</sub>HPO<sub>4</sub> in water), where indicated glucose was added at 0.4% final concentration. YESCA-  
356 CR seeded plates were allowed to dry in a sterile environment and, left to grow at 37°C. Biofilm development was  
357 followed (documented) for 6 days using a fluorescence stereoscope (Leica MZ16). Biological triplicate images were  
358 analyzed by ImageJ and prisma software was used to determine the statistical significance of the experiments by  
359 using one-way ANOVA.

### 360 **Network Construction**

361 To generate the transcriptional regulatory network that will define our genes of interest, we gathered information from  
362 research articles that contained information on genes that modulate the transition between planktonic to biofilm  
363 formation. Eventually, the data were compared with information available at Regulon DB, EcoCyc DB and Kegg

364 pathway DB. Cytoscape 3.4.1 was used to generate the transcriptional network with slight modifications <sup>49</sup>. Briefly,  
365 we transformed our mined data into activation or inhibition statements for each of the partner molecules. Secondly, to  
366 construct the network graph, we used Cytoscape 3.4.1 in which different connections were added to each node on  
367 the collected data. Next, networks were analyzed using different algorithms, such as degree, out-degree,  
368 betweenness centrality by using Cytoscape 3.4.1 software. Finally, we transformed our GFP dynamics gene  
369 expression experimental results into functional interactions (inhibits or activates). Results with same function as  
370 reported were maintained without changes in the rewired network, while those with different activity were changed in  
371 the network. During the data collection from the literature, some TFs were reported with dual effect (activation and  
372 repression) for the same target gene. For instance, *rpoS* expression was reported to be activated but also inactivated  
373 by the CRP global regulator <sup>50, 51, 52</sup>. Additionally, most of the genes that were reported as being regulated by different  
374 TFs, but in the web-databases the same gene did not present a *cis*-element to any TFs. To overcome those  
375 constrains we considered for the network that any TF, master regulator, global regulator, small molecule or RNAs  
376 could be a node. This last, despite being gathered, were not included because RNA-node analysis of regulatory gene  
377 expression significantly increases the complexity of the network <sup>12, 53</sup> and because of the complex requirements of  
378 molecular tools to evaluate this topic. For edges direction analysis, we considered the activation or inhibition most  
379 reported, or both when divergent reports were found. The data were plotted in a power-law graph using an organic  
380 algorithm to give cluster visualization generating the transcriptional regulatory network of both planktonic and biofilm  
381 structure. Furthermore, we performed degree analysis in order to present a general view of the most connected  
382 nodes, followed by edge and node betweenness analysis <sup>54</sup> in order to disclose the main effectors and the logic  
383 pathway that could describe the network. Finally, we also performed the out degree analysis at the integrated  
384 network to identify the potential talkative nodes.

385

386 **ACKNOWLEDGMENTS**

387 The authors express their thanks to members of the Silva-Rocha & Elfick labs for insightful discussion and  
388 suggestions in developing this work. This work was supported by a FAPESP Young Research Award (grant number  
389 2012/22921-8) and by a Royal Society Newton International Exchange award (NI140137). GRA was supported by a  
390 CAPES PhD fellowship while ASM was supported by FAPESP Scientific Initiation Award (2015/22386-3). AdIH was  
391 supported by an EPSRC Programme Grant (EP/J02175X) to the Flowers Consortium.

392

### 393 **AUTHOR CONTRIBUTIONS**

394 G.R.A. and R.S.R. conceived the work. G.R.A., A.dH. and A.S.M. performed the experiments. G.R.A., A.dH. and  
395 A.M.S. analyzed the data. G.R.A. and R.S.R. drafted the manuscript. A.dH. and A.E. corrected the manuscript. A.E.  
396 and R.S.R. provided funding for the execution of the work. All authors read and approved the manuscript.

### 397 **COMPETING FINANCIAL INTEREST**

398 The authors declare no competing financial interest.

### 399 **MATERIAL & CORRESPONDENCE**

400 Correspondence and material request should be addressed to Rafael Silva Rocha.

### 401 **ADDITIONAL INFORMATION**

402 Supplementary Information accompanies this paper online.

403



404 **REFERENCES**

- 405
- 406 1. Beloin C, Roux A, Ghigo JM. Escherichia coli biofilms. *Current topics in microbiology and immunology* **322**,  
407 249-289 (2008).  
408
- 409 2. Lavery G, Gorman SP, Gilmore BF. Biomolecular Mechanisms of Pseudomonas aeruginosa and  
410 Escherichia coli Biofilm Formation. *Pathogens* **3**, 596-632 (2014).  
411
- 412 3. Solano C, Echeverez M, Lasa I. Biofilm dispersion and quorum sensing. *Curr Opin Microbiol* **18**, 96-104  
413 (2014).  
414
- 415 4. Martinez-Antonio A, Janga SC, Thieffry D. Functional organisation of Escherichia coli transcriptional  
416 regulatory network. *J Mol Biol* **381**, 238-247 (2008).  
417
- 418 5. Ogasawara H, Yamamoto K, Ishihama A. Role of the biofilm master regulator CsgD in cross-regulation  
419 between biofilm formation and flagellar synthesis. *J Bacteriol* **193**, 2587-2597 (2011).  
420
- 421 6. Sanchez-Torres V, Hu H, Wood TK. GGDEF proteins YeaI, YedQ, and YfiN reduce early biofilm formation  
422 and swimming motility in Escherichia coli. *Appl Microbiol Biotechnol* **90**, 651-658 (2011).  
423
- 424 7. Serra DO, Richter AM, Klauck G, Mika F, Hengge R. Microanatomy at cellular resolution and spatial order of  
425 physiological differentiation in a bacterial biofilm. *MBio* **4**, e00103-00113 (2013).  
426
- 427 8. Pesavento C, *et al.* Inverse regulatory coordination of motility and curli-mediated adhesion in Escherichia  
428 coli. *Genes & development* **22**, 2434-2446 (2008).  
429
- 430 9. Sommerfeldt N, Possling A, Becker G, Pesavento C, Tschowri N, Hengge R. Gene expression patterns and  
431 differential input into curli fimbriae regulation of all GGDEF/EAL domain proteins in Escherichia coli.  
432 *Microbiology* **155**, 1318-1331 (2009).  
433
- 434 10. Valentini M, Filloux A. Biofilms and Cyclic di-GMP (c-di-GMP) Signaling: Lessons from Pseudomonas  
435 aeruginosa and Other Bacteria. *J Biol Chem* **291**, 12547-12555 (2016).  
436
- 437 11. Chevance FF, Hughes KT. Coordinating assembly of a bacterial macromolecular machine. *Nat Rev*  
438 *Microbiol* **6**, 455-465 (2008).  
439
- 440 12. Mika F, Hengge R. Small RNAs in the control of RpoS, CsgD, and biofilm architecture of Escherichia coli.  
441 *RNA Biol* **11**, 494-507 (2014).  
442

- 443 13. Hengge R. Stationary-Phase Gene Regulation in Escherichia coli §. *EcoSal Plus* **4**, (2011).  
444
- 445 14. Petrova OE, Sauer K. Escaping the biofilm in more than one way: desorption, detachment or dispersion.  
446 *Curr Opin Microbiol* **30**, 67-78 (2016).  
447
- 448 15. Srivastava S, Bhargava A. Biofilms and human health. *Biotechnology letters* **38**, 1-22 (2016).  
449
- 450 16. Martínez-Antonio A, Collado-Vides J. Identifying global regulators in transcriptional regulatory networks in  
451 bacteria. *Curr Opin Microbiol* **6**, 482-489 (2003).  
452
- 453 17. Ishihama A. Prokaryotic genome regulation: multifactor promoters, multitarget regulators and hierarchic  
454 networks. *FEMS Microbiol Rev* **34**, 628-645 (2010).  
455
- 456 18. Shimizu K. Metabolic Regulation and Coordination of the Metabolism in Bacteria in Response to a Variety of  
457 Growth Conditions. *Advances in biochemical engineering/biotechnology* **155**, 1-54 (2016).  
458
- 459 19. McLeod SM, Johnson RC. Control of transcription by nucleoid proteins. *Curr Opin Microbiol* **4**, 152-159  
460 (2001).  
461
- 462 20. Dillon SC, Dorman CJ. Bacterial nucleoid-associated proteins, nucleoid structure and gene expression. *Nat*  
463 *Rev Microbiol* **8**, 185-195 (2010).  
464
- 465 21. Hall-Stoodley L, Costerton JW, Stoodley P. Bacterial biofilms: from the natural environment to infectious  
466 diseases. *Nat Rev Microbiol* **2**, 95-108 (2004).  
467
- 468 22. Wood TK, Hong SH, Ma Q. Engineering biofilm formation and dispersal. *Trends Biotechnol* **29**, 87-94  
469 (2011).  
470
- 471 23. Huerta AM, Salgado H, Thieffry D, Collado-Vides J. RegulonDB: a database on transcriptional regulation in  
472 Escherichia coli. *Nucleic Acids Res* **26**, 55-59 (1998).  
473
- 474 24. Wixon J, Kell D. The Kyoto encyclopedia of genes and genomes--KEGG. *Yeast* **17**, 48-55 (2000).  
475
- 476 25. Tomoyasu T, et al. The ClpXP ATP-dependent protease regulates flagellum synthesis in Salmonella  
477 enterica serovar typhimurium. *J Bacteriol* **184**, 645-653 (2002).  
478
- 479 26. Martinez-Antonio A, Collado-Vides J. Identifying global regulators in transcriptional regulatory networks in  
480 bacteria. *Curr Opin Microbiol* **6**, 482-489 (2003).

- 481
- 482 27. Guazzaroni ME, Silva-Rocha R. Expanding the logic of bacterial promoters using engineered overlapping  
483 operators for global regulators. *ACS synthetic biology* **3**, 666-675 (2014).  
484
- 485 28. Amores GR, Guazzaroni ME, Silva-Rocha R. Engineering Synthetic cis-Regulatory Elements for  
486 Simultaneous Recognition of Three Transcriptional Factors in Bacteria. *ACS Synth Biol*, (2015).  
487
- 488 29. Venturi V. Control of rpoS transcription in Escherichia coli and Pseudomonas: why so different? *Mol*  
489 *Microbiol* **49**, 1-9 (2003).  
490
- 491 30. Liu X, Matsumura P. The FlhD/FlhC complex, a transcriptional activator of the Escherichia coli flagellar class  
492 II operons. *J Bacteriol* **176**, 7345-7351 (1994).  
493
- 494 31. Kalir S, Alon U. Using a quantitative blueprint to reprogram the dynamics of the flagella gene network. *Cell*  
495 **117**, 713-720 (2004).  
496
- 497 32. Chirwa NT, Herrington MB. CsgD, a regulator of curli and cellulose synthesis, also regulates serine  
498 hydroxymethyltransferase synthesis in Escherichia coli K-12. *Microbiology* **149**, 525-535 (2003).  
499
- 500 33. Ogasawara H, Yamada K, Kori A, Yamamoto K, Ishihama A. Regulation of the Escherichia coli csgD  
501 promoter: interplay between five transcription factors. *Microbiology* **156**, 2470-2483 (2010).  
502
- 503 34. Gerstel U, Park C, Romling U. Complex regulation of csgD promoter activity by global regulatory proteins.  
504 *Mol Microbiol* **49**, 639-654 (2003).  
505
- 506 35. Barembruch C, Hengge R. Cellular levels and activity of the flagellar sigma factor FliA of Escherichia coli  
507 are controlled by FlgM-modulated proteolysis. *Mol Microbiol* **65**, 76-89 (2007).  
508
- 509 36. Gualdi L, Tagliabue L, Bertagnoli S, Ierano T, De Castro C, Landini P. Cellulose modulates biofilm formation  
510 by counteracting curli-mediated colonization of solid surfaces in Escherichia coli. *Microbiology* **154**, 2017-  
511 2024 (2008).  
512
- 513 37. White-Ziegler CA, Um S, Perez NM, Berns AL, Malhowski AJ, Young S. Low temperature (23 degrees C)  
514 increases expression of biofilm-, cold-shock- and RpoS-dependent genes in Escherichia coli K-12.  
515 *Microbiology* **154**, 148-166 (2008).  
516
- 517 38. Hengge-Aronis R. Recent insights into the general stress response regulatory network in Escherichia coli.  
518 *Journal of molecular microbiology and biotechnology* **4**, 341-346 (2002).  
519

- 520 39. Mangan MW, Lucchini S, Danino V, Croinin TO, Hinton JC, Dorman CJ. The integration host factor (IHF)  
521 integrates stationary-phase and virulence gene expression in *Salmonella enterica* serovar Typhimurium. *Mol*  
522 *Microbiol* **59**, 1831-1847 (2006).  
523
- 524 40. Martinez-Santos VI, Medrano-Lopez A, Saldana Z, Giron JA, Puente JL. Transcriptional regulation of the  
525 *ecp* operon by EcpR, IHF, and H-NS in attaching and effacing *Escherichia coli*. *J Bacteriol* **194**, 5020-5033  
526 (2012).  
527
- 528 41. Huang J, Chen S, Huang K, Yang L, Wu B, Peng D. [Identification of *rpoE* gene associated with biofilm  
529 formation of *Salmonella pullorum*]. *Wei sheng wu xue bao = Acta microbiologica Sinica* **55**, 156-163 (2015).  
530
- 531 42. Baba T, *et al.* Construction of *Escherichia coli* K-12 in-frame, single-gene knockout mutants: the Keio  
532 collection. *Mol Syst Biol* **2**, 2006.0008 (2006).  
533
- 534 43. Sambrook J. *Molecular Cloning: A Laboratory Manual* (ed<sup>^</sup>(eds). Cold Spring Harbor Laboratory (1989).  
535
- 536 44. Sperandio V, Torres AG, Kaper JB. Quorum sensing *Escherichia coli* regulators B and C (QseBC): a novel  
537 two-component regulatory system involved in the regulation of flagella and motility by quorum sensing in *E.*  
538 *coli*. *Mol Microbiol* **43**, 809-821 (2002).  
539
- 540 45. O'Toole GA. Microtiter dish biofilm formation assay. *Journal of visualized experiments : JoVE*, (2011).  
541
- 542 46. de Las Heras A, Xiao W, Sren V, Elfick A. Edwin. *SLAS technology* **22**, 50-62 (2017).  
543
- 544 47. Prigent-Combaret C, *et al.* Complex regulatory network controls initial adhesion and biofilm formation in  
545 *Escherichia coli* via regulation of the *csgD* gene. *J Bacteriol* **183**, 7213-7223 (2001).  
546
- 547 48. Zhou Y, Smith DR, Hufnagel DA, Chapman MR. Experimental manipulation of the microbial functional  
548 amyloid called curli. *Methods Mol Biol* **966**, 53-75 (2013).  
549
- 550 49. Cline MS, *et al.* Integration of biological networks and gene expression data using Cytoscape. *Nat Protoc* **2**,  
551 2366-2382 (2007).  
552
- 553 50. Mika F, Hengge R. A two-component phosphotransfer network involving ArcB, ArcA, and RssB coordinates  
554 synthesis and proteolysis of sigmaS (RpoS) in *E. coli*. *Genes Dev* **19**, 2770-2781 (2005).  
555
- 556 51. Hengge R. Proteolysis of sigmaS (RpoS) and the general stress response in *Escherichia coli*. *Res Microbiol*  
557 **160**, 667-676 (2009).  
558

- 559 52. Jofré MR, Rodríguez LM, Villagra NA, Hidalgo AA, Mora GC, Fuentes JA. RpoS integrates CRP, Fis, and  
560 PhoP signaling pathways to control Salmonella Typhi hlyE expression. *BMC Microbiol* **14**, 139 (2014).  
561
- 562 53. Mika F, Hengge R. Small Regulatory RNAs in the Control of Motility and Biofilm Formation in E. coli and  
563 Salmonella. *Int J Mol Sci* **14**, 4560-4579 (2013).  
564
- 565 54. Pasemann F. Complex dynamics and the structure of small neural networks. *Network* **13**, 195-216 (2002).  
566
- 567 55. Grant SG, Jessee J, Bloom FR, Hanahan D. Differential plasmid rescue from transgenic mouse DNAs into  
568 Escherichia coli methylation-restriction mutants. *Proc Natl Acad Sci U S A* **87**, 4645-4649 (1990).  
569
- 570 56. Datsenko KA, Wanner BL. One-step inactivation of chromosomal genes in Escherichia coli K-12 using PCR  
571 products. *Proc Natl Acad Sci U S A* **97**, 6640-6645 (2000).  
572
- 573 57. Bachmann BJ. Pedigrees of some mutant strains of Escherichia coli K-12. *Bacteriol Rev* **36**, 525-557  
574 (1972).  
575  
576  
577  
578  
579  
580  
581  
582

583  
584

**Tables**

**Table 1.** Bacterial strains, plasmids and primers used in this study.

| Strain                         | Description                                                                                                                                                                                                                          | Reference  |
|--------------------------------|--------------------------------------------------------------------------------------------------------------------------------------------------------------------------------------------------------------------------------------|------------|
| <i>E. coli</i> DH5α            | F <sup>-</sup> <i>endA1 glnV44 thi-1 recA1 relA1 gyrA96 deoR nupG purB20</i><br>φ80 <i>dlacZ</i> ΔM15 Δ( <i>lacZYA-argF</i> )U169, <i>hsdR17</i> ( <i>r<sub>K</sub>m<sub>K</sub></i> <sup>+</sup> ), λ <sup>-</sup> .                | 55         |
| <i>E. coli</i> BW25113         | <i>lacI<sup>r</sup>rmB<sub>T14</sub> ΔlacZ<sub>WJ16</sub> hsdR514 ΔaraBAD<sub>AH33</sub> ΔrhaBAD<sub>LD78</sub> rph-1</i><br>Δ( <i>araB-D</i> )567 Δ( <i>rhaD-B</i> )568 Δ <i>lacZ4787</i> (:: <i>rmB-3</i> ) <i>hsdR514 rph-1</i> . | 56         |
| <i>E. coli</i> JW1702          | <i>E. coli</i> BW25113 Δ <i>ihfA</i> mutant strain                                                                                                                                                                                   | 56         |
| <i>E. coli</i> JW3229          | <i>E. coli</i> BW25113 Δ <i>fis</i> mutant strain                                                                                                                                                                                    | 56         |
| <i>E. coli</i> MG1655          | K-12 F <sup>-</sup> λ- <i>ilvG-</i> <i>rfb-50 rph-1</i>                                                                                                                                                                              | 57         |
| <b>Plasmids</b>                |                                                                                                                                                                                                                                      |            |
| pMR1                           | CmR, <i>oriP15a</i> ; GFP <i>lva</i> promoter probe vector                                                                                                                                                                           | 27         |
| pMR1-Pj100                     | CmR, <i>oriP15a</i> ; pMR with synthetic constitutive promoter BBa_J23100                                                                                                                                                            | This study |
| pMR1-PrpoS                     | CmR, <i>oriP15a</i> ; pMR1- <i>rpoS</i> -GFP <i>lva</i> transcriptional fusion                                                                                                                                                       | This study |
| pMR1-PrpoE                     | CmR, <i>oriP15a</i> ; pMR1- <i>rpoE</i> -GFP <i>lva</i> transcriptional fusion                                                                                                                                                       | This study |
| pMR1-PcsgD                     | CmR, <i>oriP15a</i> ; pMR1- <i>csgD</i> -GFP <i>lva</i> transcriptional fusion                                                                                                                                                       | This study |
| pMR1-PflhD                     | CmR, <i>oriP15a</i> ; pMR1- <i>flhD</i> -GFP <i>lva</i> transcriptional fusion                                                                                                                                                       | This study |
| pMR1-PfliA                     | CmR, <i>oriP15a</i> ; pMR1- <i>fliA</i> -GFP <i>lva</i> transcriptional fusion                                                                                                                                                       | This study |
| pMR1-PyeaJ                     | CmR, <i>oriP15a</i> ; pMR1- <i>yeaJ</i> -GFP <i>lva</i> transcriptional fusion                                                                                                                                                       | This study |
| pMR1-AdrA                      | CmR, <i>oriP15a</i> ; pMR1- <i>adrA</i> -GFP <i>lva</i> transcriptional fusion                                                                                                                                                       | This study |
| pMR1-PcpxR                     | CmR, <i>oriP15a</i> ; pMR1- <i>cpxR</i> -GFP <i>lva</i> transcriptional fusion                                                                                                                                                       | This study |
| pMR1-PmatA                     | CmR, <i>oriP15a</i> ; pMR1- <i>matA</i> -GFP <i>lva</i> transcriptional fusion                                                                                                                                                       | This study |
| pMR1-PompR                     | CmR, <i>oriP15a</i> ; pMR1- <i>ompR</i> -GFP <i>lva</i> transcriptional fusion                                                                                                                                                       | This study |
| pMR1-PfliA/IHFmut              | CmR, <i>oriP15a</i> ; pMR1- <i>fliA</i> /IHFmut-GFP <i>lva</i> transcriptional fusion                                                                                                                                                | This study |
| pMR1-PyeaJ/Fismut              | CmR, <i>oriP15a</i> ; pMR1- <i>yeaJ</i> /Fismut-GFP <i>lva</i> transcriptional fusion                                                                                                                                                | This study |
| <b>Primers</b>                 |                                                                                                                                                                                                                                      |            |
| <b>Sequence</b>                |                                                                                                                                                                                                                                      |            |
| 5 <i>adrA</i> EcoRI            | 5'-GCGCGAATTCGAAAAAAGTTTGACGCCAC-3'                                                                                                                                                                                                  | This study |
| 3 <i>adrA</i> BamHI            | 5'-GCGCGGATCCCAATTTTCCCAAATTATAGAGACGG-3'                                                                                                                                                                                            | This study |
| 3 <i>adrA</i> SphI             | 5'-GCGCGCATGCGCACGTTTACGCCATTAC-3'                                                                                                                                                                                                   | This study |
| 5 <i>cpxR</i> EcoRI            | 5'-GCGCGAATTCGCGTGGCTTAATGAACTGAC-3'                                                                                                                                                                                                 | This study |
| 3 <i>cpxR</i> BamHI            | 5'-GCGCGGATCCTGTTTAAATACCTCCGAGGCA-3'                                                                                                                                                                                                | This study |
| 3 <i>cpxR</i> SphI             | 5'-GCGCGCATGCATGAAGCAGAAACCATCAGATAG-3'                                                                                                                                                                                              | This study |
| 5 <i>matA</i> EcoRI            | 5'-GCGCGAATTCCTTTTCACTCAAACCTGTTAAGATG-3'                                                                                                                                                                                            | This study |
| 3 <i>matA</i> BamHI            | 5'-GCGCGGATCCCCGGAAGTAAATAAGATACGT-3'                                                                                                                                                                                                | This study |
| 3 <i>matA</i> SphI             | 5'-GCGCGCATGCACCAATAATTTGCTAAGGCC-3'                                                                                                                                                                                                 | This study |
| 5 <i>ompR</i> EcoRI            | 5'-GCGCGAATTCCTCGTTGATTCCCTTTGTCT-3'                                                                                                                                                                                                 | This study |
| 3 <i>ompR</i> BamHI            | 5'-GCGCGGATCCGCAACAATTTGTAAGCGTGT-3'                                                                                                                                                                                                 | This study |
| 3 <i>ompR</i> SphI             | 5'-GCGCGCATGCCACCAGGTAACATTAATCCAG-3'                                                                                                                                                                                                | This study |
| 5 <i>fliA</i> - IHFmut overlap | 5'-CCC GGGTTGCACATTC CCGGGG CCGGATAAGGCGT-3'                                                                                                                                                                                         | This study |
| 3 <i>fliA</i> - IHFmut overlap | 5'-CCCCGGGAATGTGCAACCCGGGTAAATTGCAATTCAACTGTAGGC-3'                                                                                                                                                                                  | This study |
| 5 <i>yeaJ</i> -Fismut EcoRI    | 5'-GCGCGAATTCGAAGCGAAAAGCGAGGG-3'                                                                                                                                                                                                    | This study |

585 **Figure legends**

586  
587 **Figure 1. General strategy to define novel regulatory interactions controlling planktonic/biofilm transition.**

588 The flagella-biofilm network was constructed and analyzed based on available data from the literature. Subsequently,

589 analysis of the promoter architecture regions of the principal nodes effectors was performed to confirm the  
590 interactions reported. Next, cloning of the natural promoter regions in the pMR1-reporter system were developed.  
591 Promoter activity was determined for each promoter in different conditions as established in material and methods.  
592 Finally, GFP activity was transform into connectivity data and loaded into flagella-biofilm network to gain a better  
593 understanding of this program.

594 **Figure 2. Flagella-biofilm transcriptional regulatory network.** The principal nodes and paths, which drive the  
595 flagella-biofilm network were analyzed using Cytoscape 3.4.1. The network was analyzed by using betweenness  
596 centrality and edge betweenness centrality algorithms<sup>54</sup>. Size of the nodes (circles) indicates betweenness analysis  
597 and width of the Edges (lines connections the circles) indicates the edge betweenness analysis. Scale colors from  
598 red to bright to dark indicate the high to low values.

599 **Figure 3. Effect of CRP, IHF and Fis GRs over the promoter activity of *rpoS*, *rpoE* and *flhD*.** Promoter activity  
600 assay of (A) pMR1-*PrpoS*, (B) pMR1-*PrpoE*, and (C) pMR1-*PflhD* were evaluated in *E. coli* BW25113 *wild type* (blue  
601 line),  $\Delta ihf$  (red line) and  $\Delta fis$  (green line) in 96well plate as described in methods in the absence (left panel) or  
602 presence (right panel) of 0.4% of glucose. GFP fluorescence was measured each 20 minutes at 37 °C during 8 hours  
603 in static conditions and normalized by OD600. Solid lines represents the average from three independent  
604 experiments while dashed lines are the upper and lower limits of standard error of the mean (S.E.M).

605 **Figure 4. Effect of CRP, IHF and Fis GRs on the promoter activity of *csgD*, *fliA* and *yeaJ*.** GFP promoter activity  
606 assay of (A) pMR1-*PcsgD*, (B) pMR1-*PfliA*, and (C) pMR1-*PyeaJ* were evaluated in *E. coli* BW25113 *wt* (blue line),  
607  $\Delta ihf$  (red line) and  $\Delta fis$  (green line) in 96well plate as described in methods in the absence (left panel) or presence  
608 (right panel) of 0.4% of glucose. GFP fluorescence was measured each 20 minutes at 37 °C during 8 hours in static  
609 conditions and normalized by OD600. Solid lines represents the average from three independent experiments while  
610 dashed lines are the upper and lower limits of standard error of the mean (S.E.M).

611 **Figure 5. Experimental data integration to the Flagella-biofilm transcriptional regulatory network.** Promoter  
612 activity values were transformed into activation or repression connections and were loaded into Cytoscape 3.4.1. An  
613 organic algorithm was used to the properly cluster visualization. The network was analyzed by use the betweenness  
614 centrality and edge betweenness centrality measurements. Size of the nodes (circles) indicates betweenness  
615 analysis and width of the Edges (lines connections the circles) indicates the edge betweenness analysis. Scale  
616 colors from red to bright to dark indicate the high to low values.

617 **Figure 6. Effect of GRs in the motility program at 24h.** Motility phenotype of *E. coli* BW25113 wild-type and  
618 mutant strains were evaluated by cell motility assay at 24h in the presence or absence of glucose as depicted.

619 Divergent motility capability is observed between the different conditions, proving the effect of the GRs CRP, IHF and  
620 Cis to modulate the motility program. The results are representative of 3 independent experiments.

621 **Figure 7. Capability of *E. coli* and mutant strains to develop adherence and mature biofilm.** A) Adherence  
622 capability of *E. coli* BW25113 *wild-type*,  $\Delta ihf$  and  $\Delta fis$  were evaluated in 96-well plate using violet crystal method.  
623 Comparisons of adherence capability of BW25113 wt and mutant strains at 30 and 37°C are shown. Vertical bars are  
624 standard deviations calculated from three independent experiments. B) Mature biofilm formation of *E. coli* BW25113  
625 *wt*,  $\Delta ihf$  and  $\Delta fis$  strains were perform using congo red plate assay. Comparisons of the mature biofilm morphological  
626 characteristics of wild type and mutant strains at 37°C in the presence or absence of glucose is shown. Dashed line,  
627 Zone III; white line, zone II; black line, zone I; arrows represent wrinkles and clefts structures. The results are  
628 representative of 3 independent experiments.



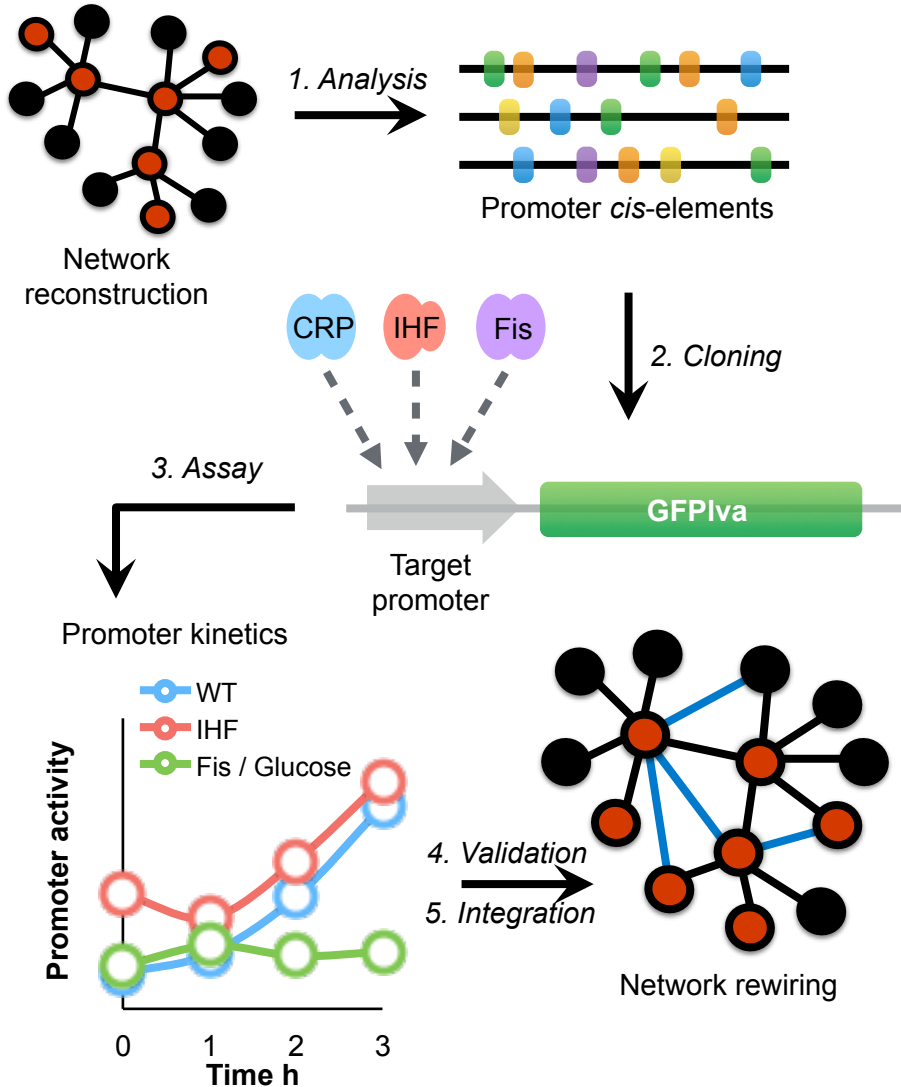

Figure 1

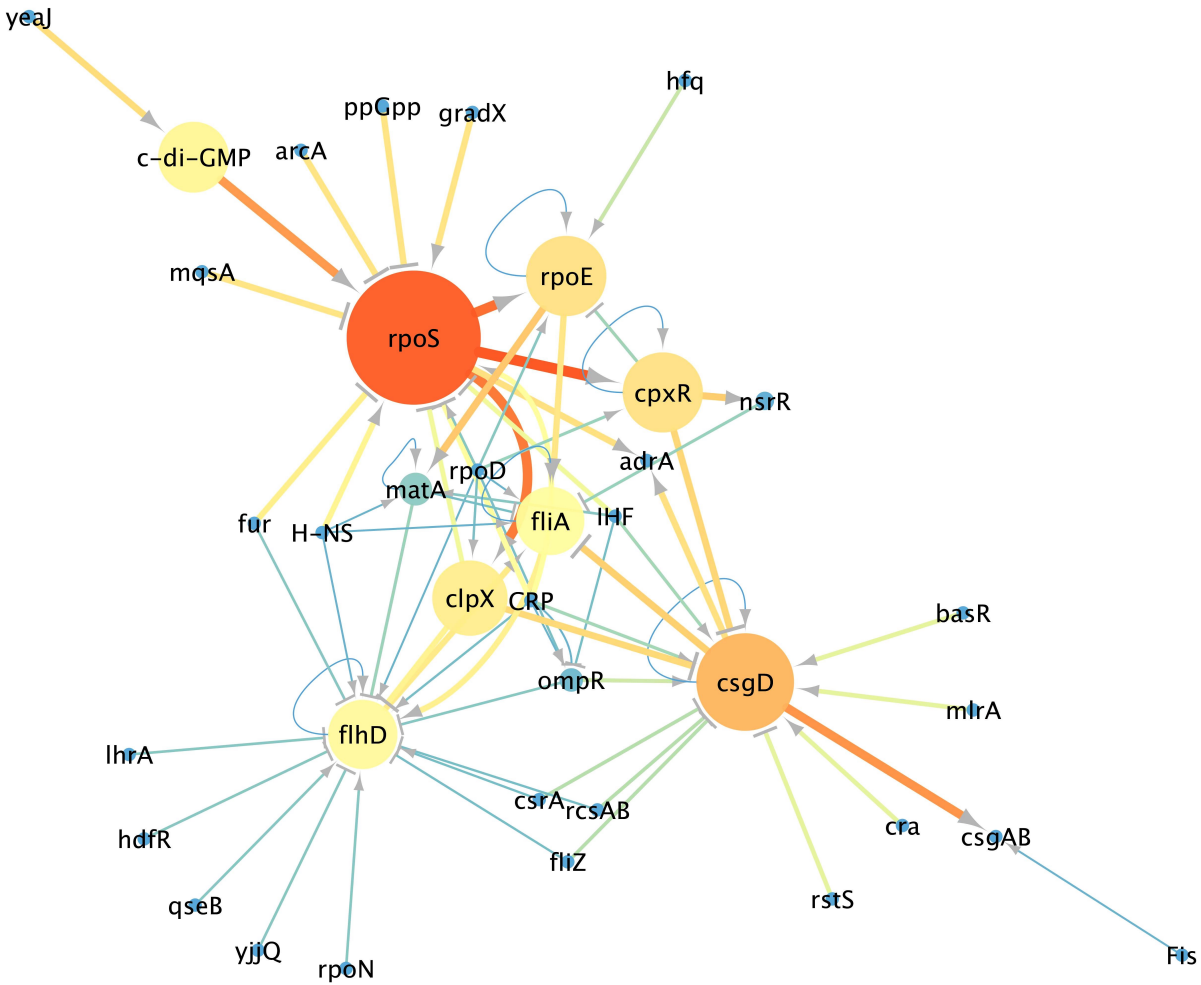

Figure 2

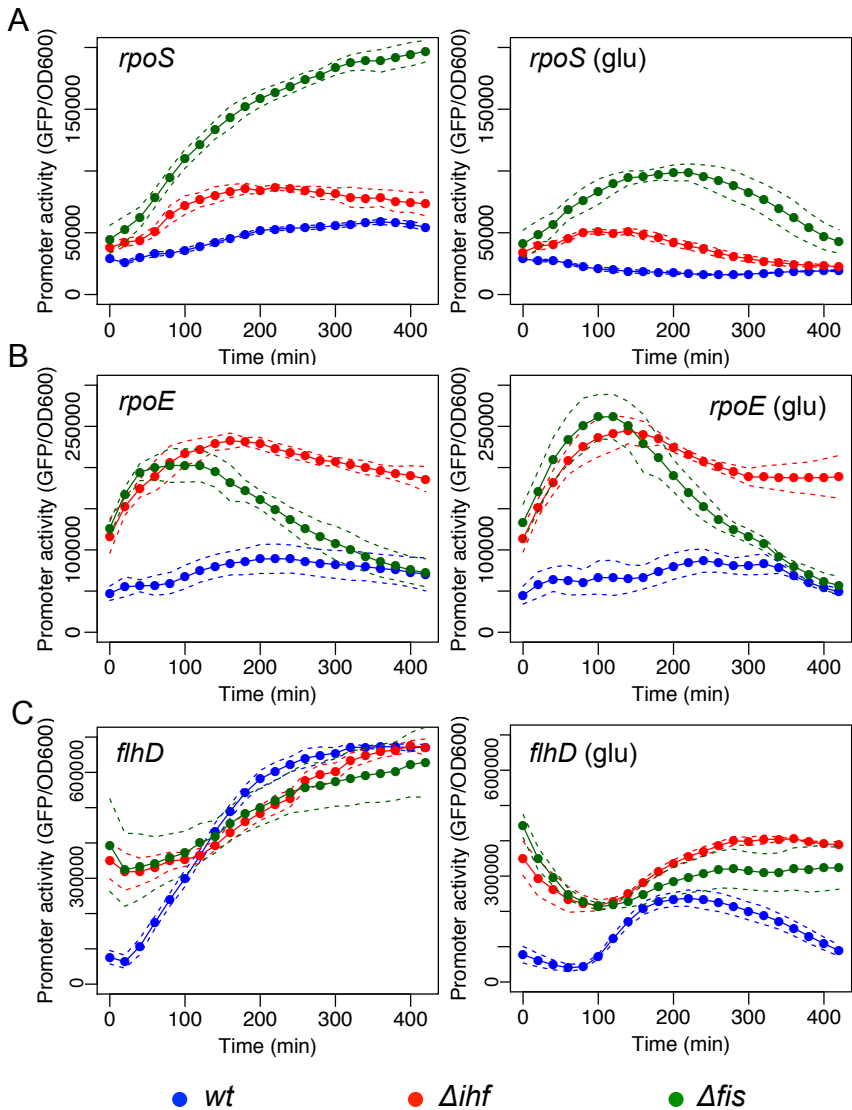

Figure 3

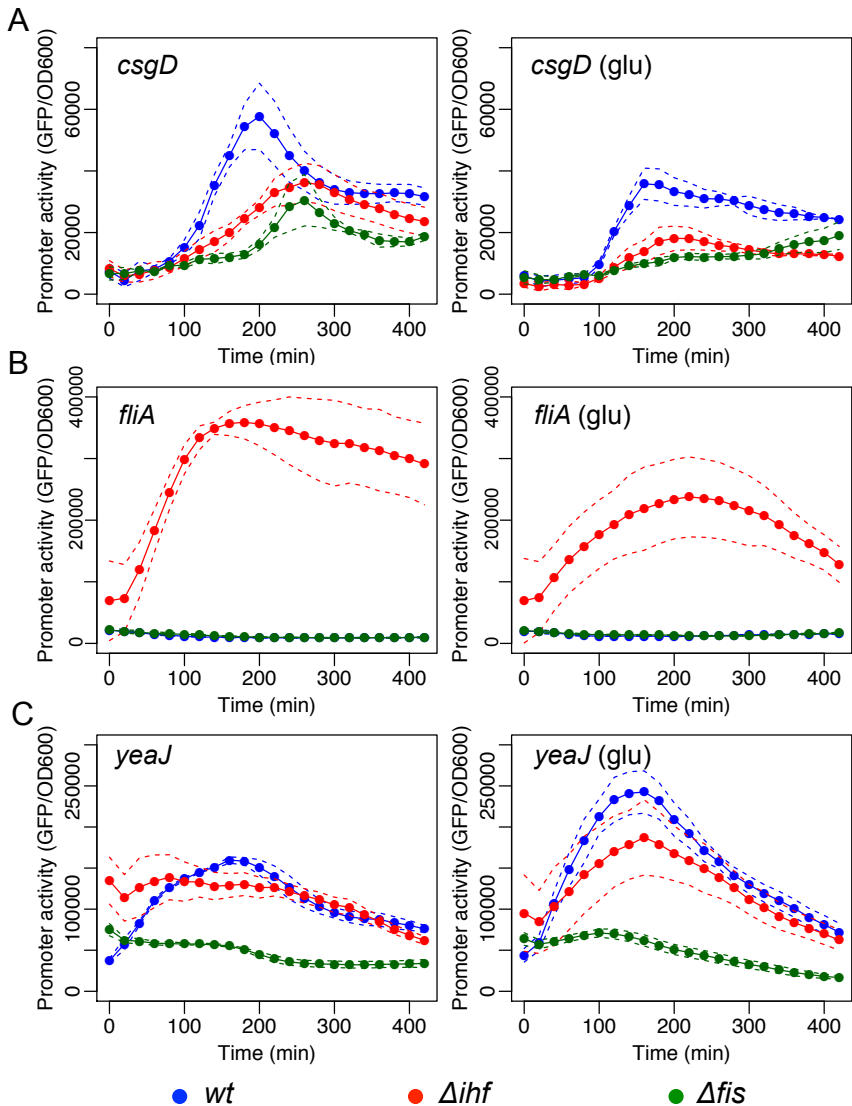

Figure 4

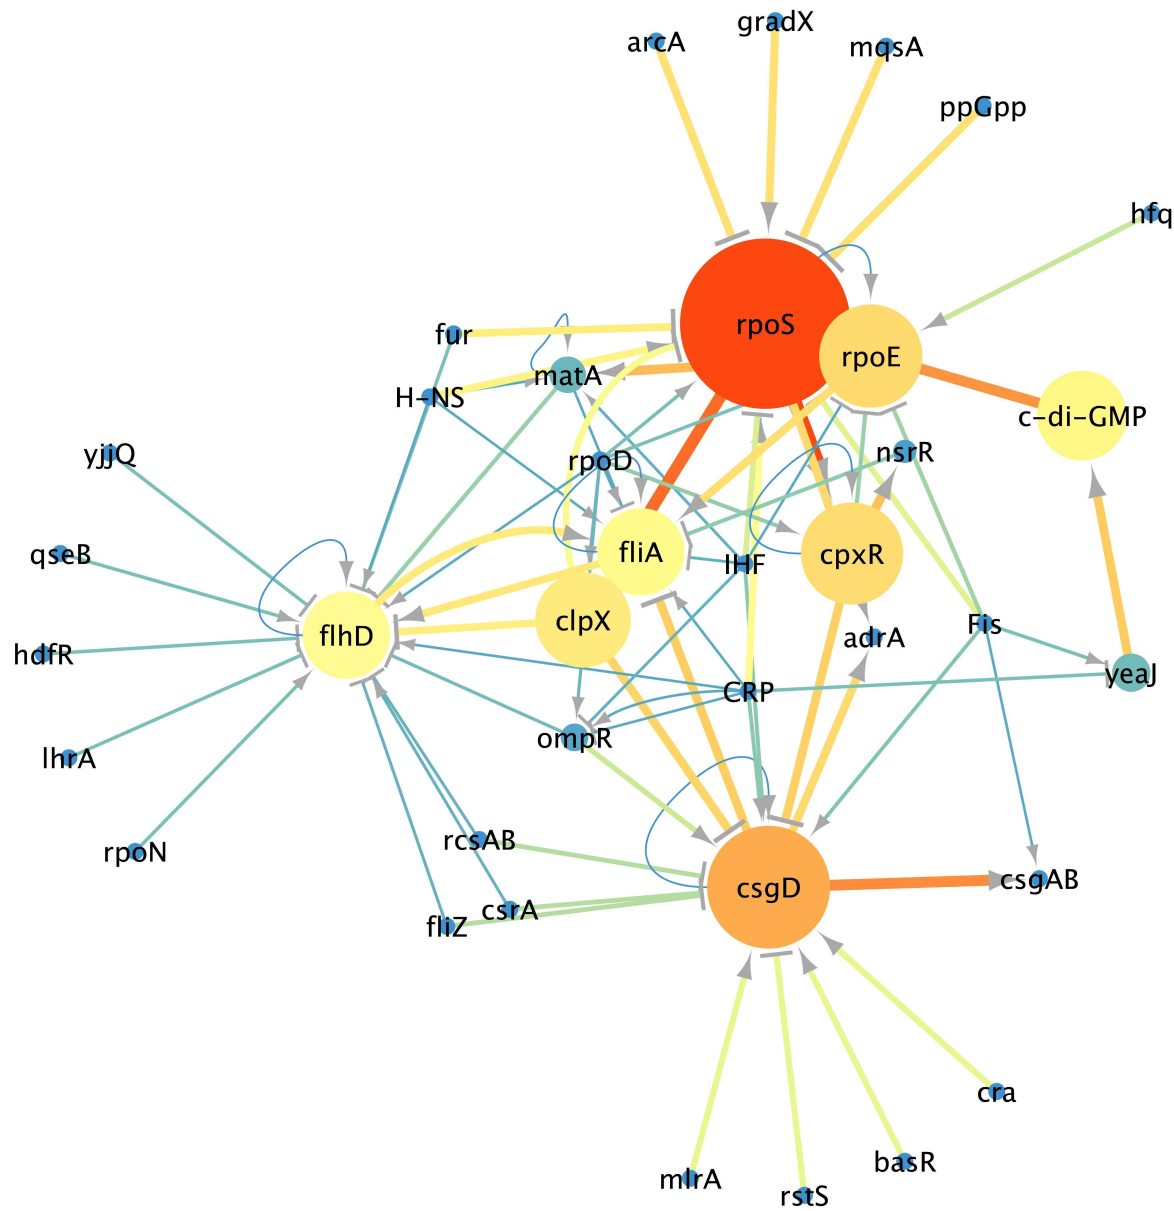

Figure 5

Control

Glucose

Wild-type

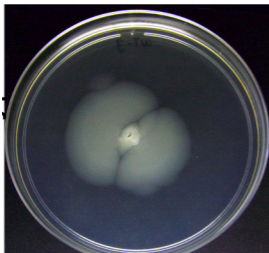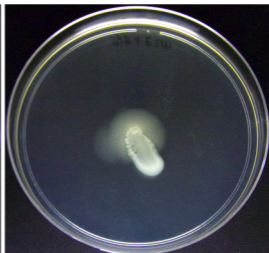

$\Delta$ lih1

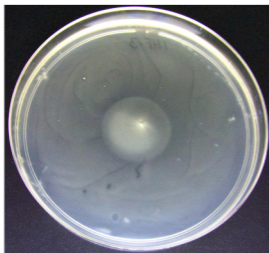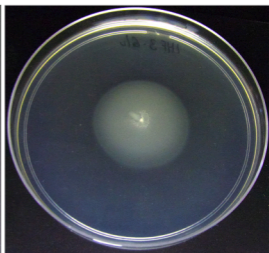

$\Delta$ fis1

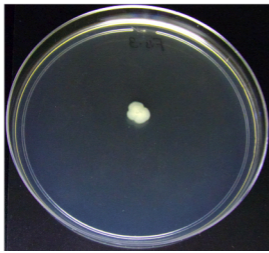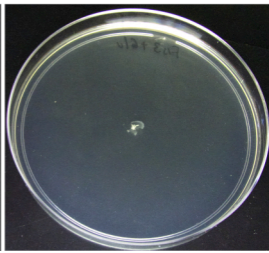

Figure 6

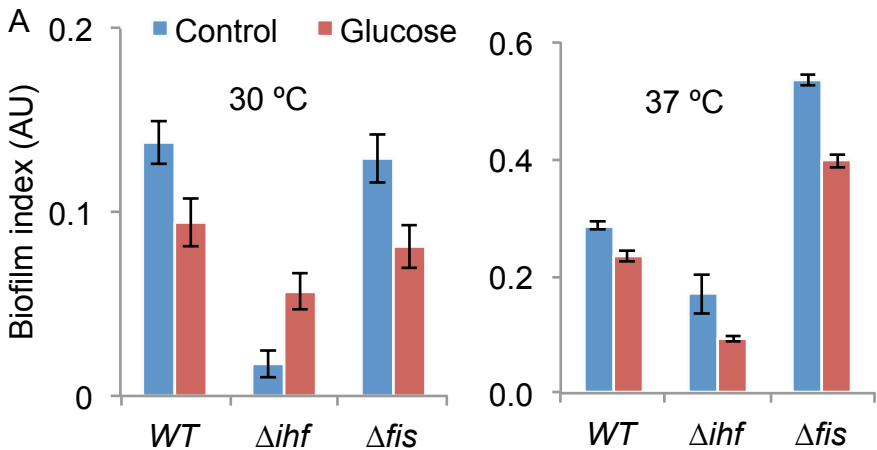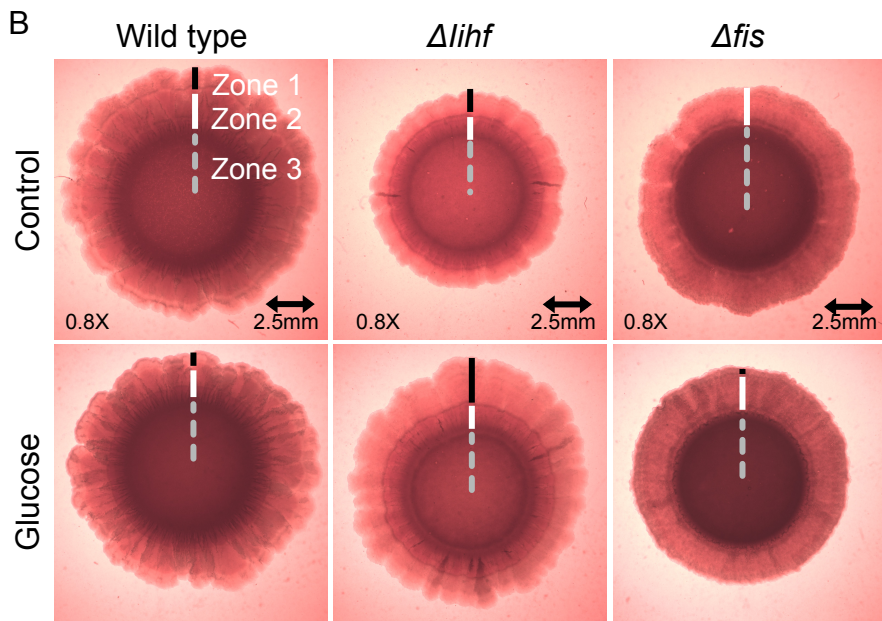

Figure 7
